# Supplementary material
Source: PubMed Central journal article supplement (PMC4001387)
Supplement: supp_tpc.114.123893_tpc123893Supplemental.pdf [file supp_tpc.114.123893_tpc123893Supplemental.pdf]

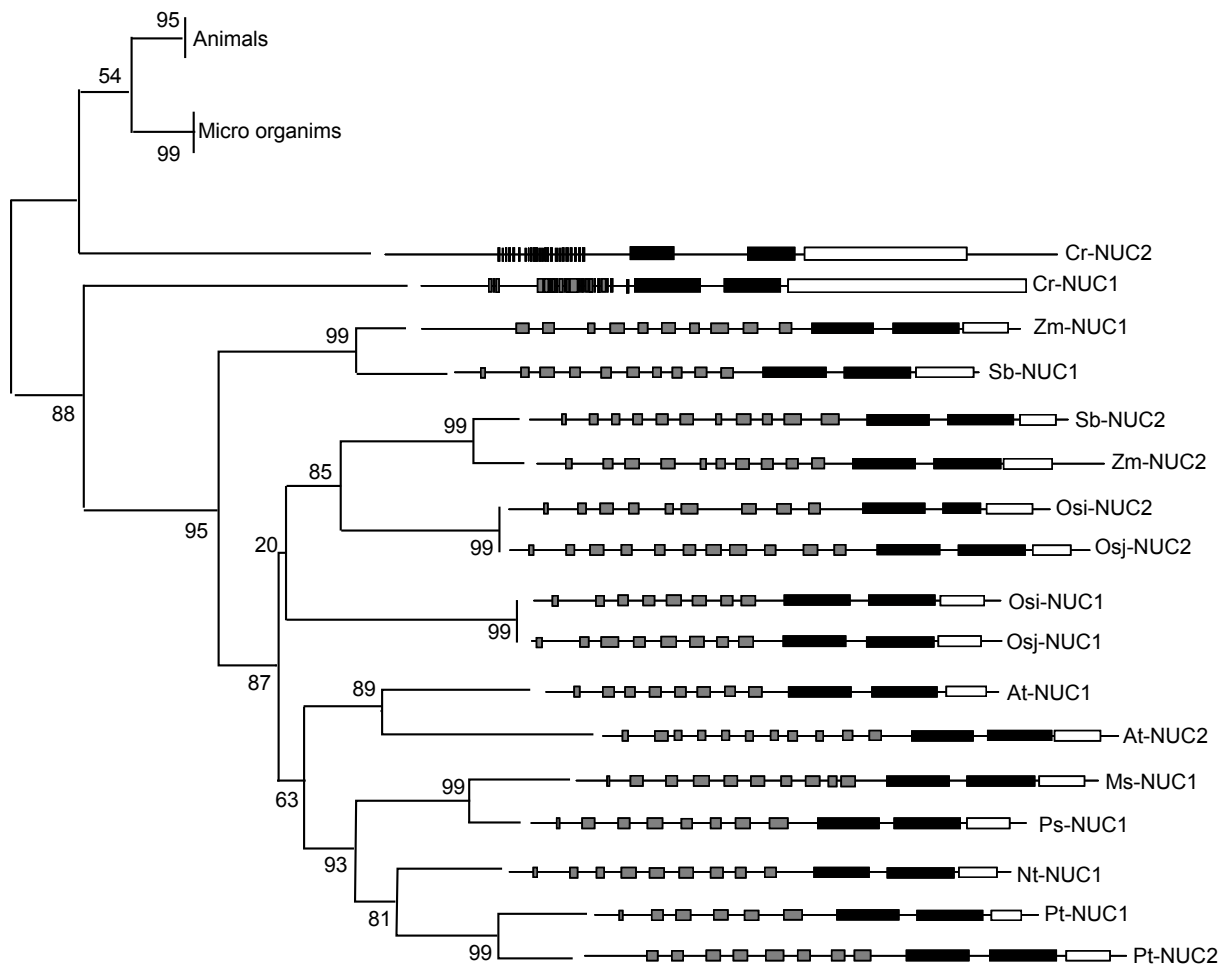

**Supplemental Figure 1:** The phylogenetic tree was generated with MEGA4 software, using Neighbour Joining method coupled with 1000 bootstrap tests. The percentage value of Bootstrap is shown. Schematic of nucleolin and nucleolin-like proteins from *Arabidopsis thaliana*, Q9FVQ1 (At-NUC1) and Q1PEP5 (At-NUC2), *Oryza sativa* ssp. *japonica*, Q6Z1C0 (Osj-NUC1) and Q7XTT4 (Osj-NUC2); *Oryza sativa* ssp. *indica*, BGIOSIBCE026772 (Osj-NUC1) and BGIOSIBCE016635 (Osj-NUC2), *Sorghum bicolor*, Sb07g005510 (Sb-NUC1), and Sb01g019710 (Sb-NUC2); *Zea mays* FGP025 (Zm-NUC1) and FGT019 (Zm-NUC2), *Populus trichocarpa*, 002310655 (Pt-NUC1) and 002307174 (Pt-NUC2), *Medicago sativa*, T09648 (Ms-NUC1), *Nicotiana tabacum* Q8LNZ4 (Nt-NUC1), *Pisum sativum* T06458 (Ps-NUC1), *Chlamydomonas reinhardtii* XP\_001689665.1 (CrNUC1) and GO:0003676 (CrNUC2).

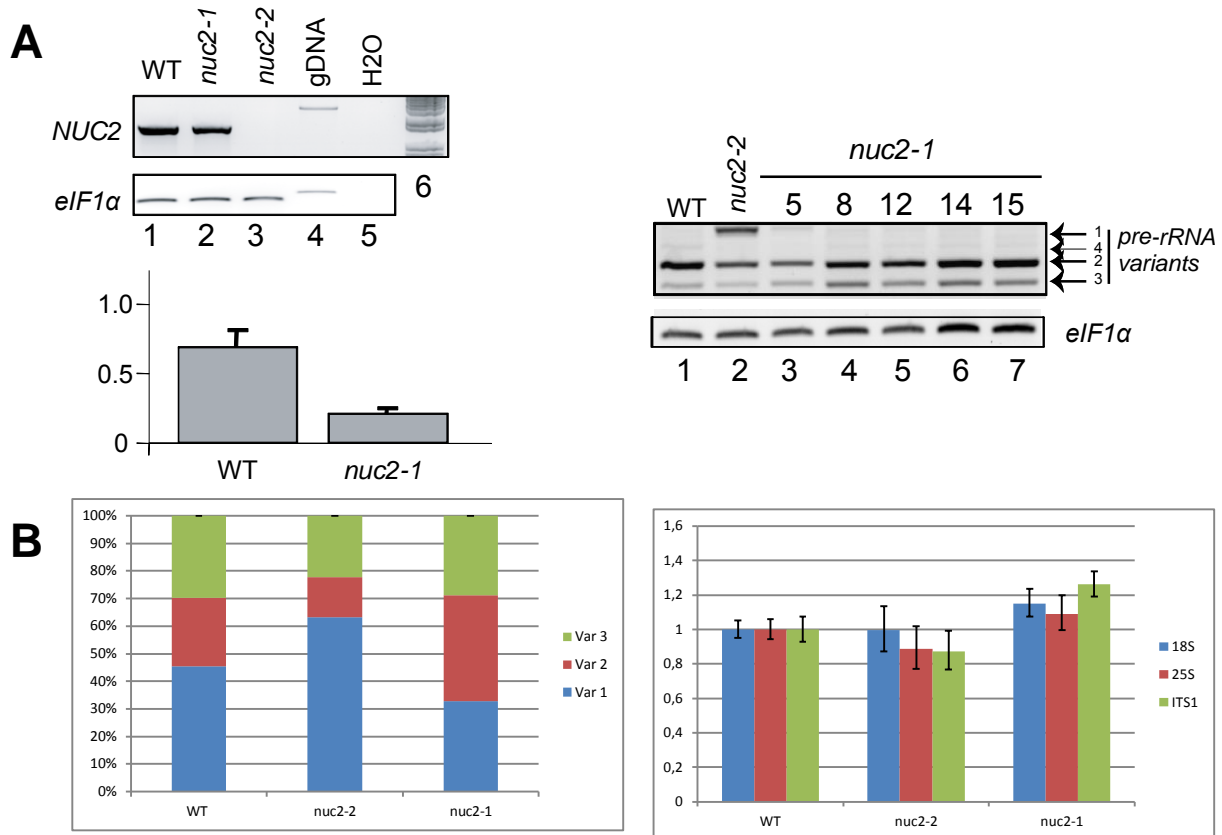

**Supplemental Figure 2: A) Left:** RT-PCR and RT-qPCR reactions using cDNA prepared from 15 day-old WT (lane 1), *nuc2-1* (lane 2) and *nuc2-2* (lane 3) seedlings and primers *5'nuc2/3'nuc2* or *5'nuc2q/3'nuc2q* to detect *NUC2* transcripts. Amplification of *eIF1α* transcripts was performed to verify similar amounts of cDNA in each sample. Absence of genomic contamination in the cDNA samples was verified by amplification of *eIF1α* genomic DNA that generates higher molecular size bands (lane 4). **Right:** RT-PCR reactions using cDNA prepared from 15 day-old WT (lane 1), *nuc2-2* (lane 2), and *nuc2-1* (lanes 3-7) seedlings and primers *5'3ets/3'3ets* to detect 3'ETS pre-rRNA respectively. Amplification of *eIF1α* transcripts was performed to verify similar amounts of cDNA in each sample. **B) Left:** PCR amplification of 3'ETS sequences using genomic DNA from WT, *nuc2-2*, *nuc2-1* mutant plants. Relative abundance of each rDNA variant was determined using a LabChip GX system. The bar graphs show the percentage of rDNA VAR1 (blue), VAR2 (red) and VAR3 (green). **Right:** qPCR analysis to amplify 18S, 25S and ITS1 rDNA sequences respectively from WT, *nuc2-2*, *nuc2-1* mutant plants. The bar graphs show relative amounts of rDNA 18S (blue), 25S (red) and ITS1 (green).

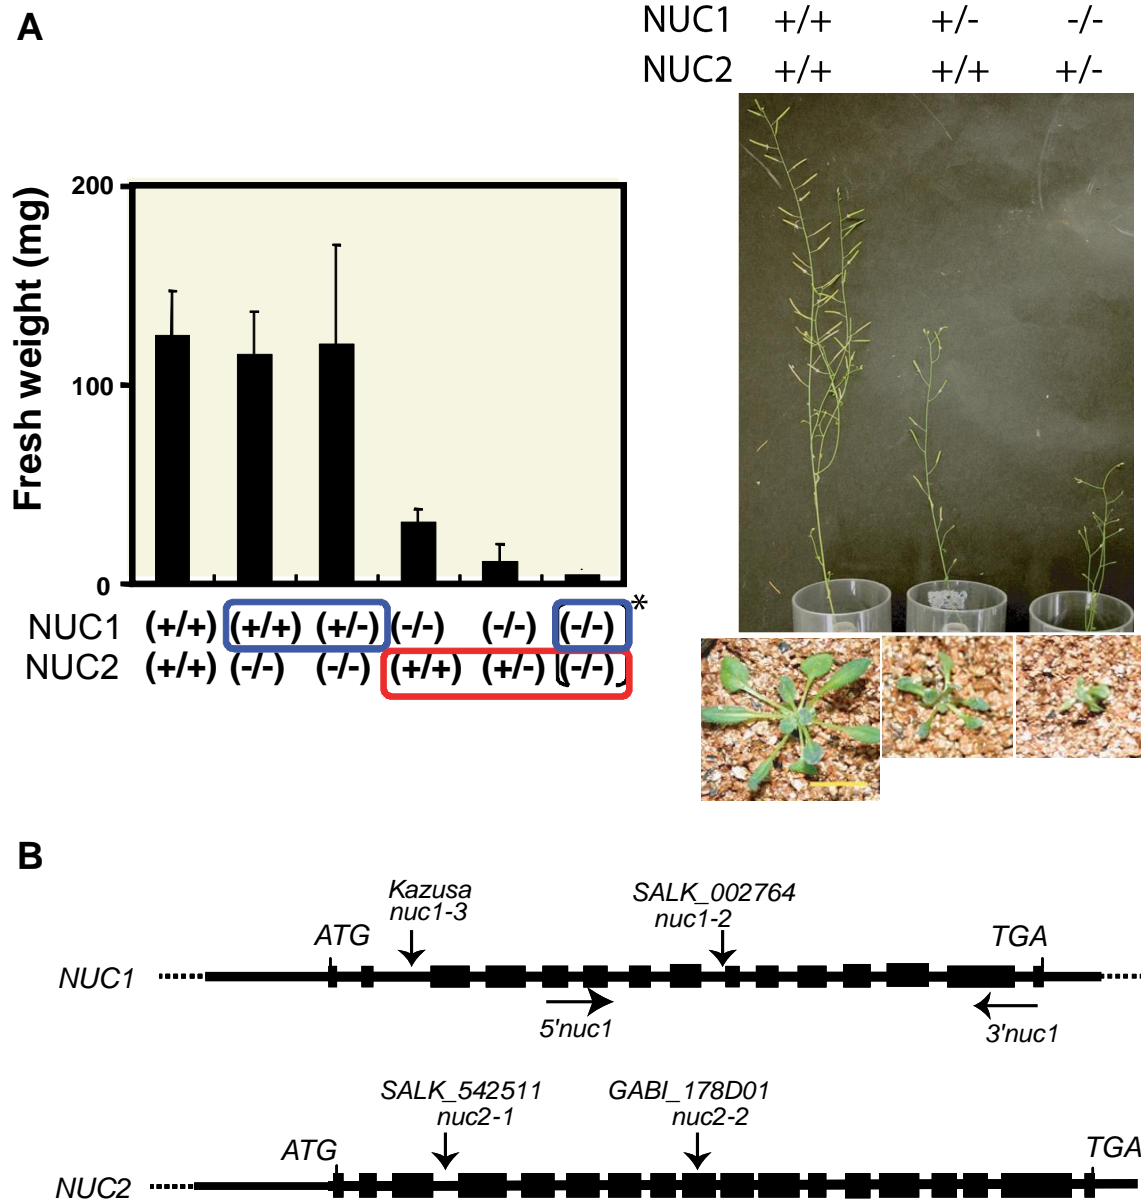

**Supplemental Figure 3: A)** Analysis of WT, *nuc1-3* (Kojima et al., 2007), *nuc2-1* (SALK\_542511) and *nuc1-3nuc2-1* double mutant plants. Left: Bar graph shows fresh weight of WT, *nuc2-1* (with two or one *NUC1* gene), *nuc1-3* (with two or one *NUC2* gene) and *nuc1-3nuc2-1* double mutant plants. Right: WT and *nuc1-3* containing one *NUC2* gene plants grown on soil. **B)** Diagram of *NUC1* and *NUC2* genes from the ATG start to the TGA stop codon is shown. The black boxes correspond to exons separated by introns. The T-DNA insertion in the *NUC1* and *NUC2* mutant plants is indicated.

Supplemental Data. Durut et al. (2014). Plant Cell 10.1105/tpc.114.123893

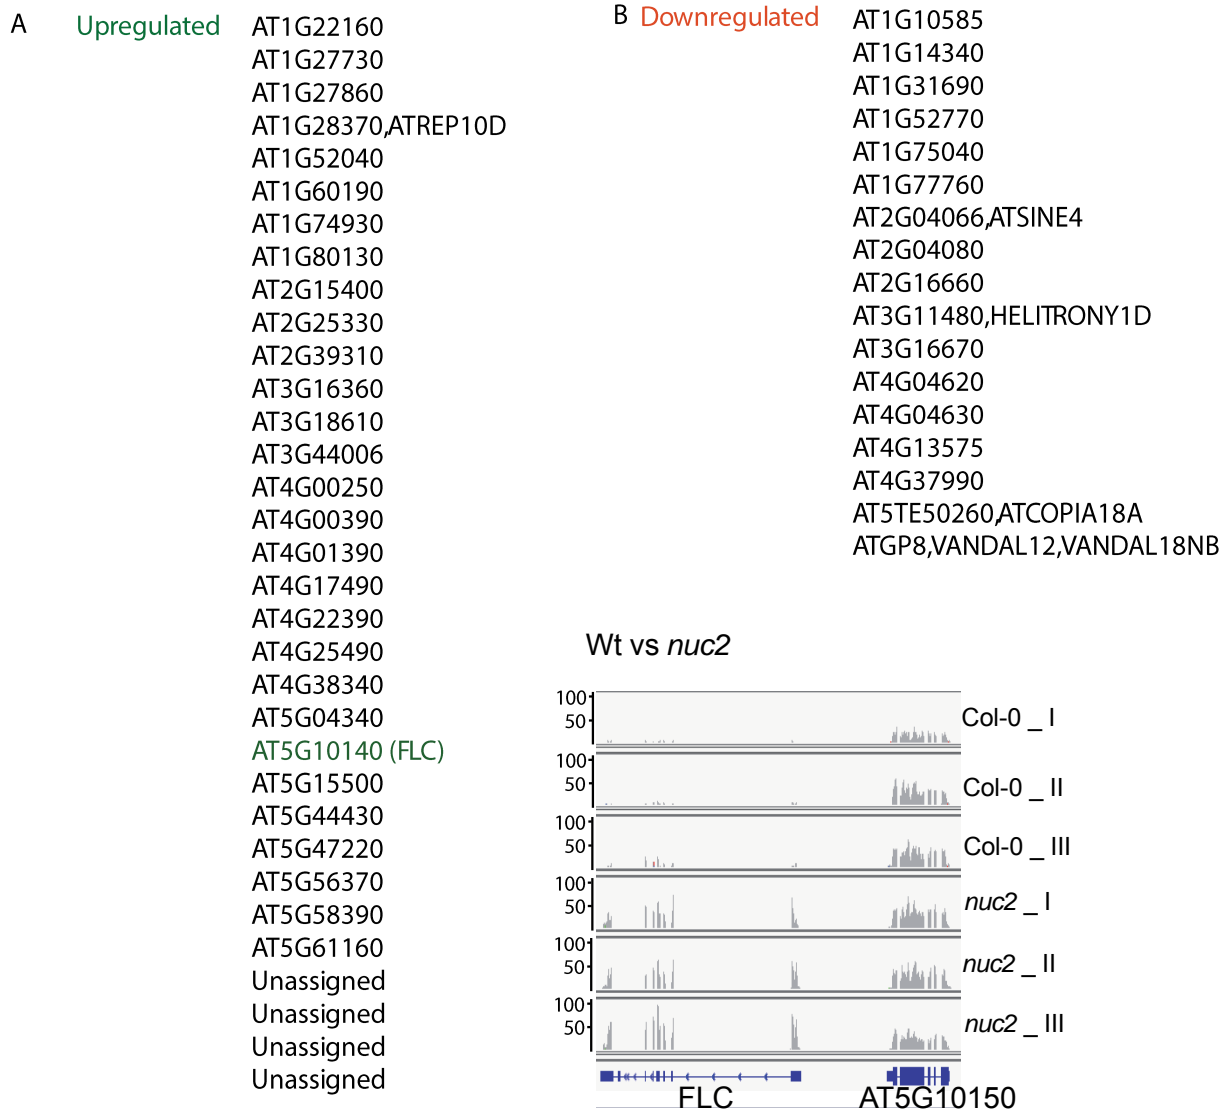

**Supplemental Figure 4:** RNAseq analysis of *nuc2-2* plants. List of up and down-regulated genes in *nuc2-2* mutant compared to WT plants. FLC (green) is highlighted. The graph shows expression of FLC in three WT and *nuc2-2* samples. The identification of At3g18610 (*NUC2*) among the up-regulated genes is due to the accumulation of truncated (upstream, but not downstream of the T-DNA insertion) and reversed transcripts originated from 35S promoter located in the LB border of the T-DNA insertion.

**A**

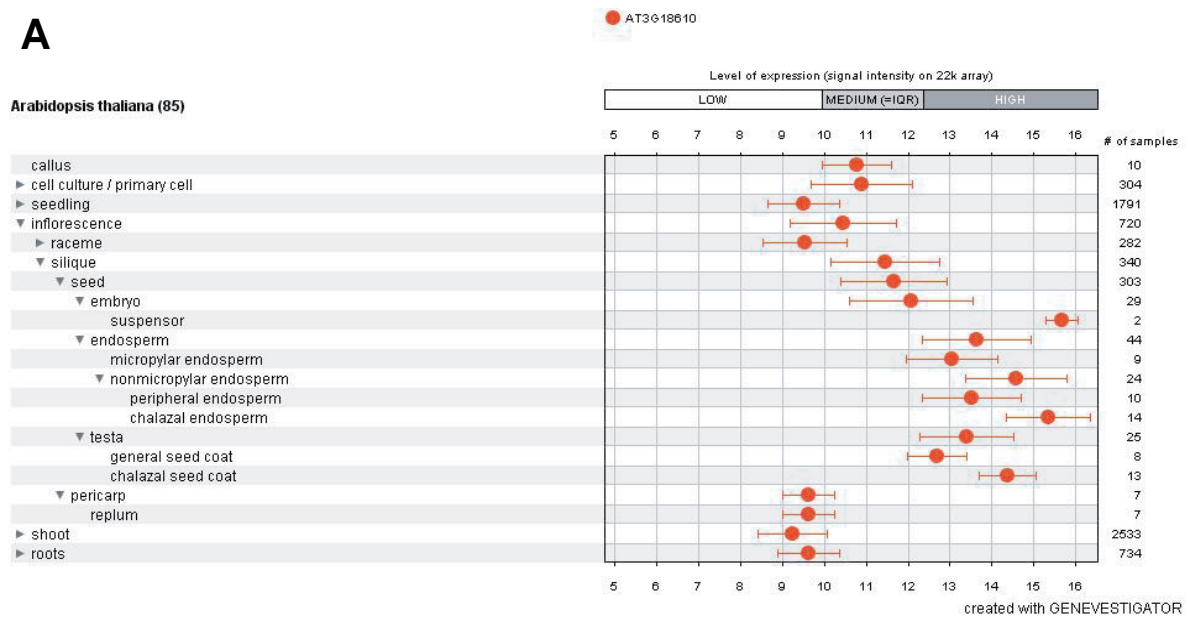

**B**

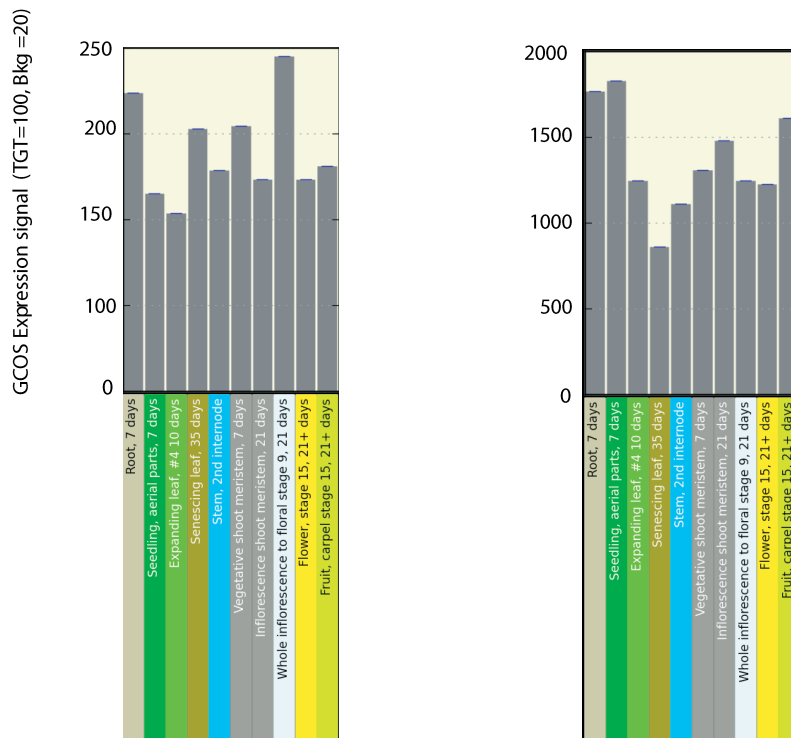

**Supplemental Figure 5:** Analysis *in silico* to compare relative expression level of *NUC1* and *NUC2* genes. Data were obtained from microarray available ([www.bar.utoronto.ca/welcome.htm](http://www.bar.utoronto.ca/welcome.htm) and [www.genevestigator.com/gv/](http://www.genevestigator.com/gv/)).

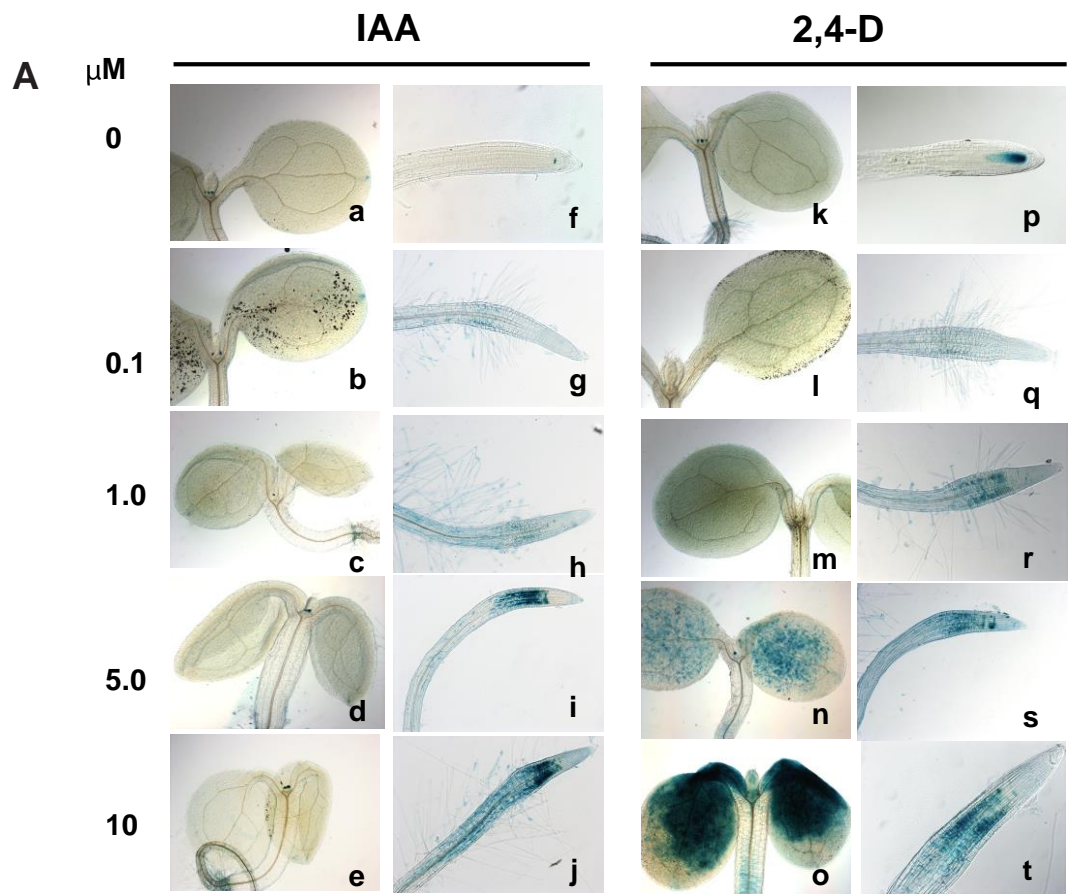

● AT3G18610 ● AT1G48920

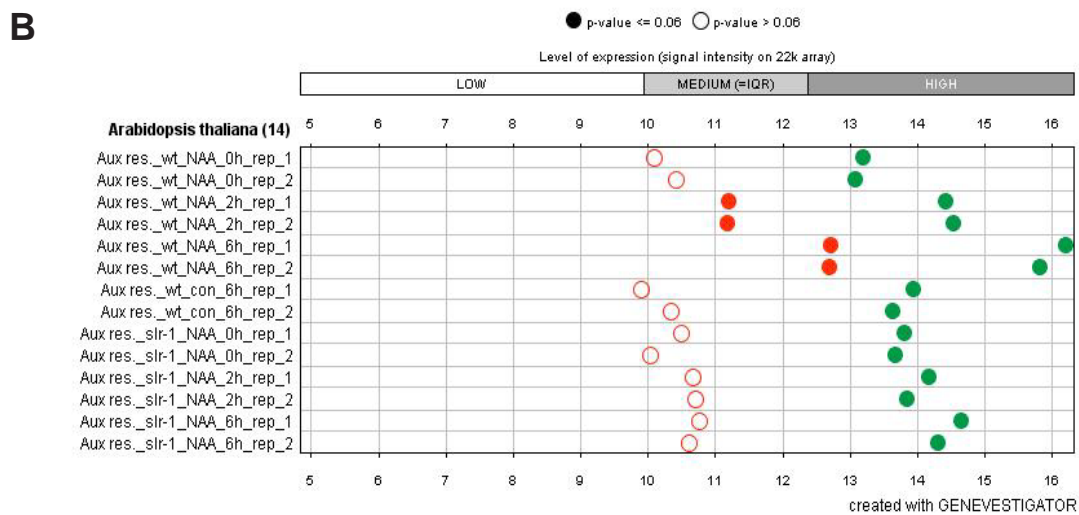

**Supplemental Figure 6: A)** Five day-old *A. thaliana* seedlings grown on Wattman/MS medium were transferred for 24h to MS liquid medium containing 0, 0.1, 1.0, 5.0 and 10  $\mu\text{M}$  of IAA (a-j) or 2,4 D (k-t). **B)** Analysis *in silico* to compare relative expression levels of *NUC1* (green dots) and *NUC2* (red dots) genes in response to auxin. Data were obtained from a microarray available on [www.genevestigator.com/gv/](http://www.genevestigator.com/gv/).



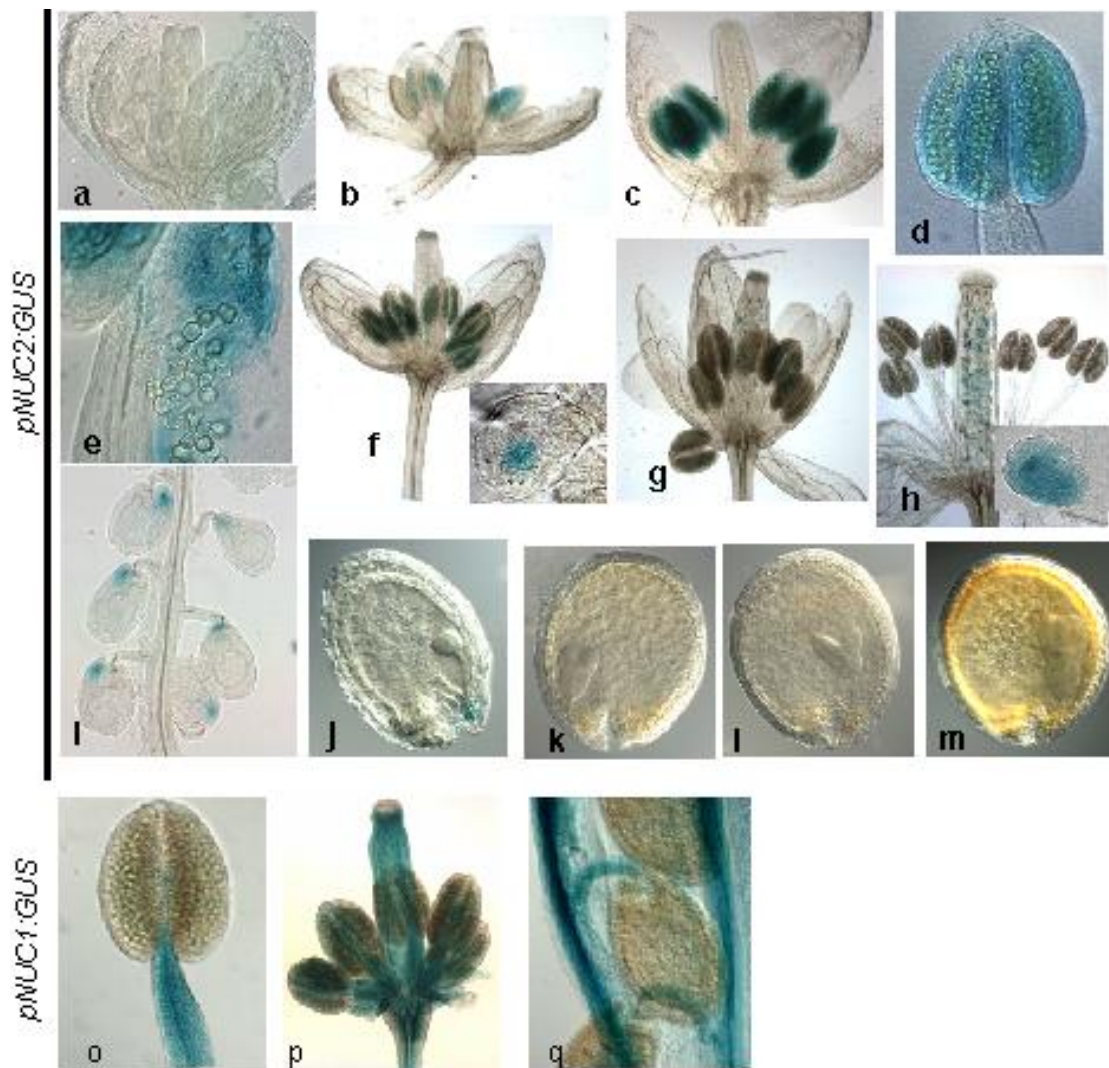

**Supplemental Figure 7:** GUS staining is not detected at stage 8 (a) or before (not shown), but it appears continually in anthers from stage 9 to stage 11 (b-c and f). GUS staining is detected in the pollen grain sacs, mainly in the tapetum cells and in the walls or parenchyma cells (d) but not in young pollen grains (e). At stage 11, GUS staining decreases in anthers but appears early in nucellus and/or embryo sac (f and insert). Then, at stage 12, the GUS staining increases in pistils (g) and it is clearly observed in embryo sacs at stage 15 (h and insert). Finally, GUS staining is detected at globular stage in the mycropilar (i-j) to disappear at heart (k), torpedo (l) and linear cotyledon (m). Interestingly, *NUC1* promoter activity, is detected in filament (o), pistil at stage 12 (p) and mycropilar at globular stage (q). In these tissues and organs we do not observe GUS staining activity when reporter gene is fused to *NUC2* promoter sequences (compare o, p, q with d, g and i).

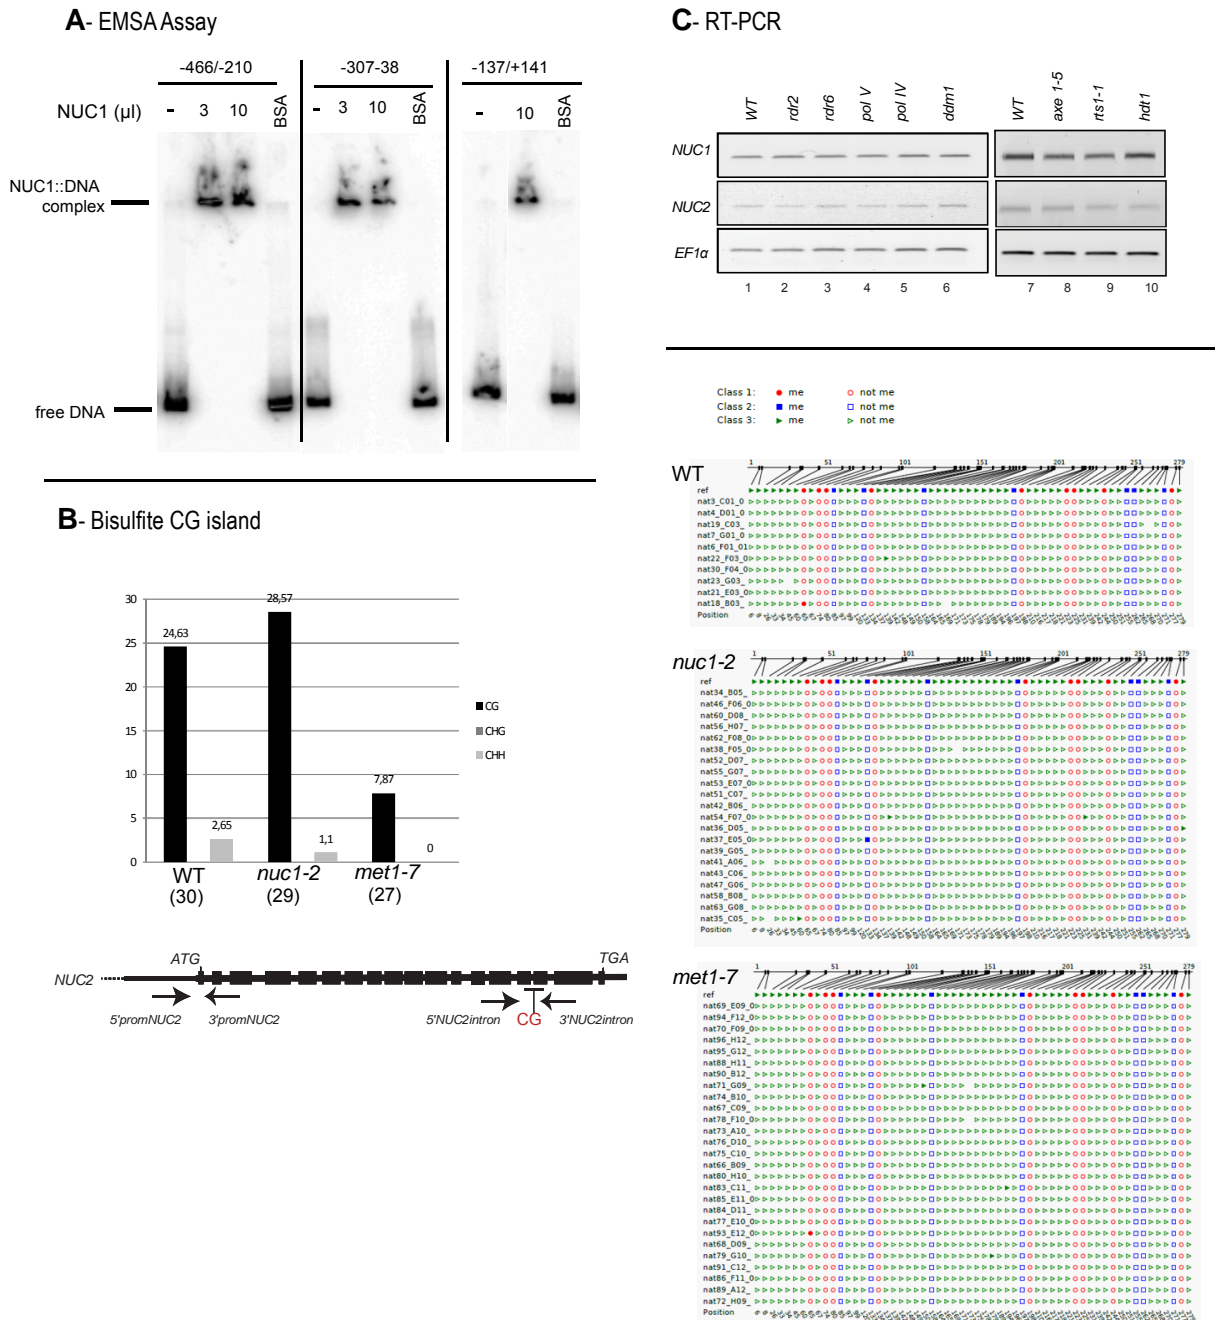

**Supplemental Figure 8: A)** NUC1 binds *NUC2* sequences. Analysis of NUC1 binding activity on 4% polyacrylamide gel. EMSA was performed with 3 and 10  $\mu\text{L}$  of His-NUC1 recombinant protein (20 ng/ $\mu\text{L}$ ). BSA was used as control protein for binding activity. **B)** Bisulfite sequencing analysis of *NUC2* gene in WT, *nuc1-2* and *met1-7* plants. Left: The Bar graph shows the representation (%) of methylated sites in the intron sequence. Right: Graphical representation of bisulfite sequencing in the promoter. The images were generated by using CyMATE. **C)** RT-PCR reactions to detect *NUC1* and *NUC2* transcripts in *rdr2*, *rdr6*, *pol IV*, *pol V*, *ddm1*, *axe 1-5*, *rts1-1* and *hdt1* mutant plants.



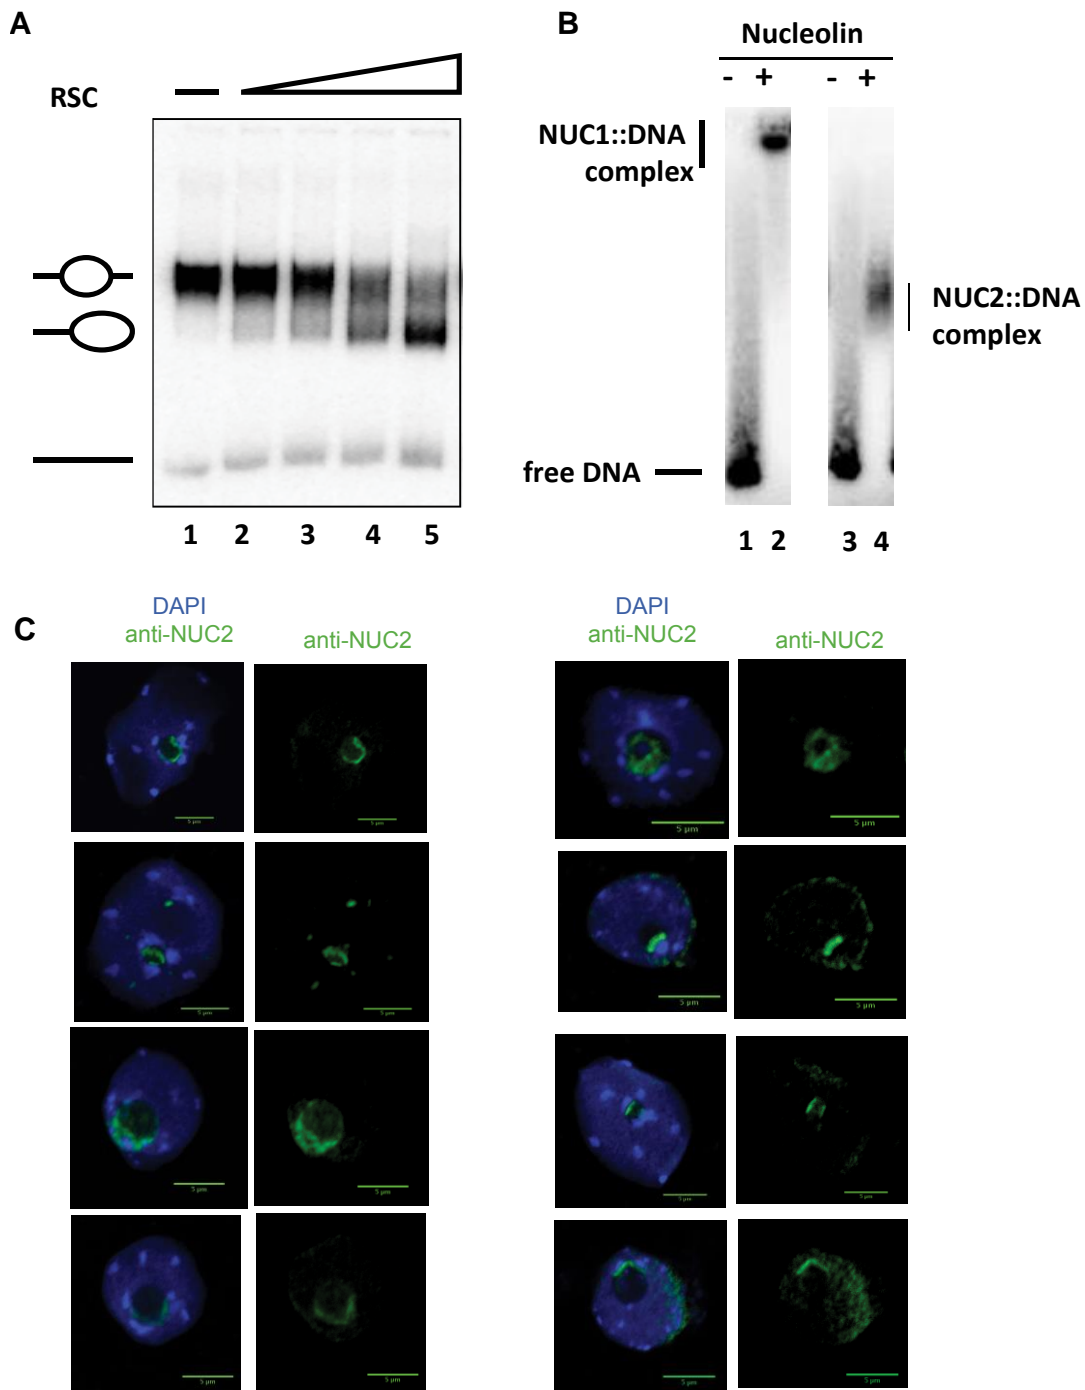

**Supplemental Figure 9: A)** Titration of RSC in nucleosome remodeling assay. Nucleosomes incubated with increasing amount of RSC (lanes 2-5) result in an efficient mobilization and formation of end-positioned nucleosomes **B)** Incubation of NUC1 (lane 2) or NUC2 (lane 4) with radiolabelled DNA. Lanes 1 and 3; *NUC2* sequence (-307/-38) alone. Protein::DNA complexes are resolved in a 1% agarose gel in 0.5X TBE buffer conditions. Note that NUC1 protein forms a protein-DNA complex that migrates more slowly compared with the protein-DNA complex formed by NUC2 protein. **C)** Immunolocalization of NUC2 in leaves from *nuc1* plants. The NUC2 signal (green) practically co-localizes with chromatin counterstained with DAPI (blue) situated in the periphery of the nucleolus. This is observed consistently in different *nuc1* nuclei.

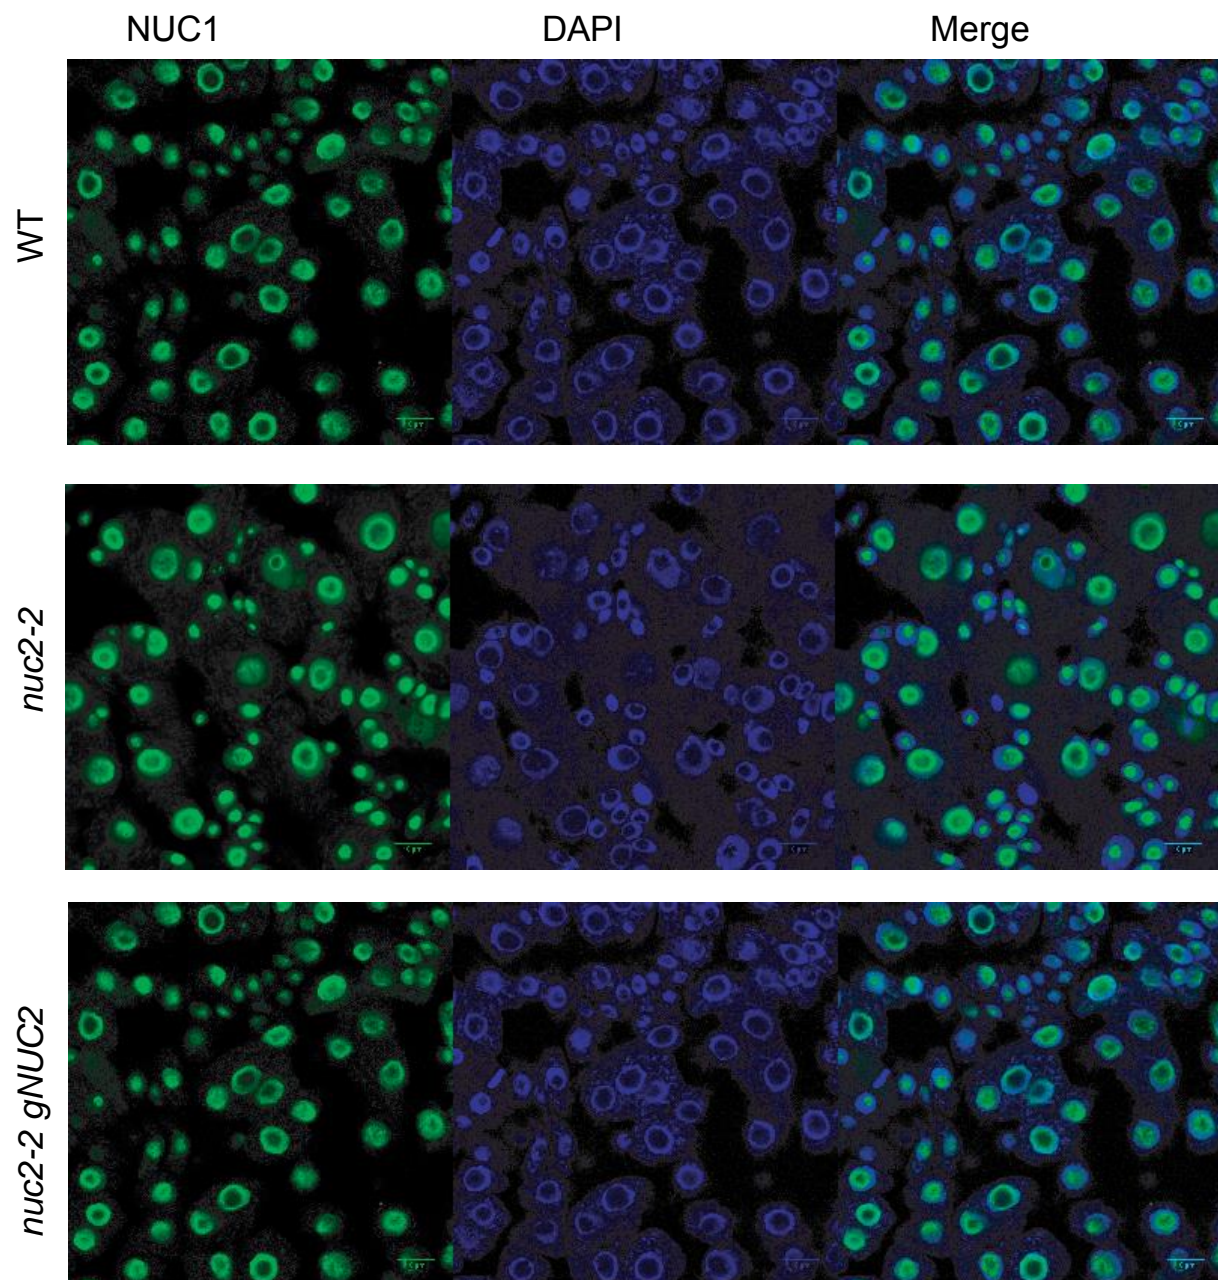

**Supplemental Figure 10:** Immunolocalization of NUC1 in WT, *nuc2-2* and *nuc2-2 gNUC2* plants. Nucleolin was detected in the nucleolus of WT and mutated plants. Immunostaining was performed using antibodies against NUC1 peptide described previously and Alexa 488 (Roche).

Supplemental Data. Durut et al. (2014). Plant Cell 10.1105/tpc.114.123893

|                     | 24 Cycles |       |       | 24 Cycles (diluted samples) |       |       |
|---------------------|-----------|-------|-------|-----------------------------|-------|-------|
|                     | VAR1      | VAR2  | VAR3  | VAR1                        | VAR2  | VAR3  |
| WT                  | 45,43     | 24,8  | 29,77 | 45,85                       | 24,55 | 29,6  |
| <i>nuc2-2</i>       | 61,42     | 13,67 | 24,91 | 62,59                       | 12,31 | 25,1  |
| <i>nuc2-2 gNUC2</i> | 64,6      | 11,07 | 23,04 | 64,03                       | 11,84 | 24,13 |
| <i>nuc1-2</i>       | 44,64     | 29,51 | 25,85 | 44,54                       | 27,99 | 27,47 |
| <i>fas2-4</i>       | 27,28     | 31,47 | 41,25 | 26,46                       | 31,36 | 42,17 |
|                     | 18 cycles |       |       | 18 cycles (diluted samples) |       |       |
|                     | VAR1      | VAR2  | VAR3  | VAR1                        | VAR2  | VAR3  |
| WT                  | 48,66     | 23,15 | 28,19 | 49,69                       | 22,18 | 28,13 |
| <i>nuc2-2</i>       | 63,62     | 13,62 | 22,76 | 64,3                        | 13,33 | 22,37 |
| <i>nuc2-2 gNUC2</i> | 64,63     | 12,71 | 22,66 | 66,59                       | 12,07 | 21,34 |
| <i>fas2-4</i>       | 32,56     | 27,46 | 39,98 | 31,85                       | 27,4  | 40,75 |

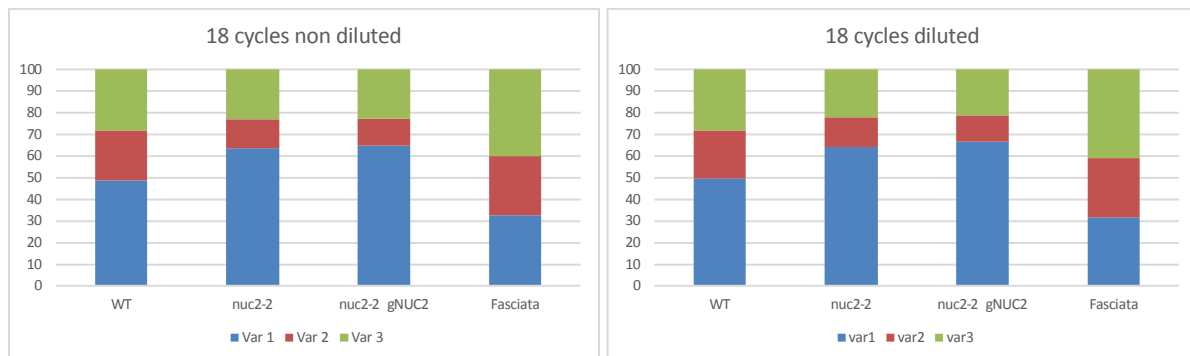

**Supplemental Figure 11:** PCR and LabChip experiments to determine relative abundance of rDNA variants in WT, *nuc1*, *nuc2*, *nuc2-2 gNUC2* and *fas2* mutant plants. LabChip experiment was realized using 18 or 24 cycles and diluted (1:4) or undiluted samples.

Supplemental Data. Durut et al. (2014). Plant Cell 10.1105/tpc.114.123893

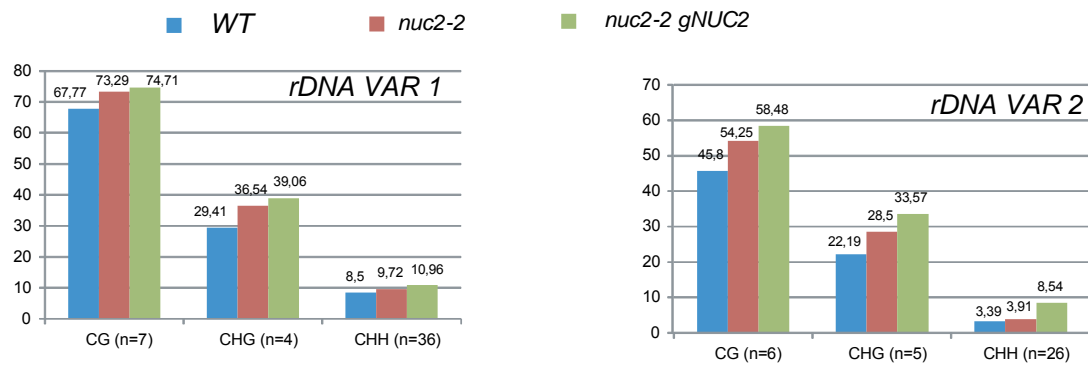

**Supplemental Figure 12:** Bisulfite sequencing analysis. The bar graphs show the percentage of methylated sites in the 3'ETS rRNA gene sequences (VAR1 and VAR2) from WT (79), *nuc2-2* (81) and *nuc2-2 gNUC2* (78) mutant plants in a CG, CHG and CHH context. *n*= number of potentially methylated sites.

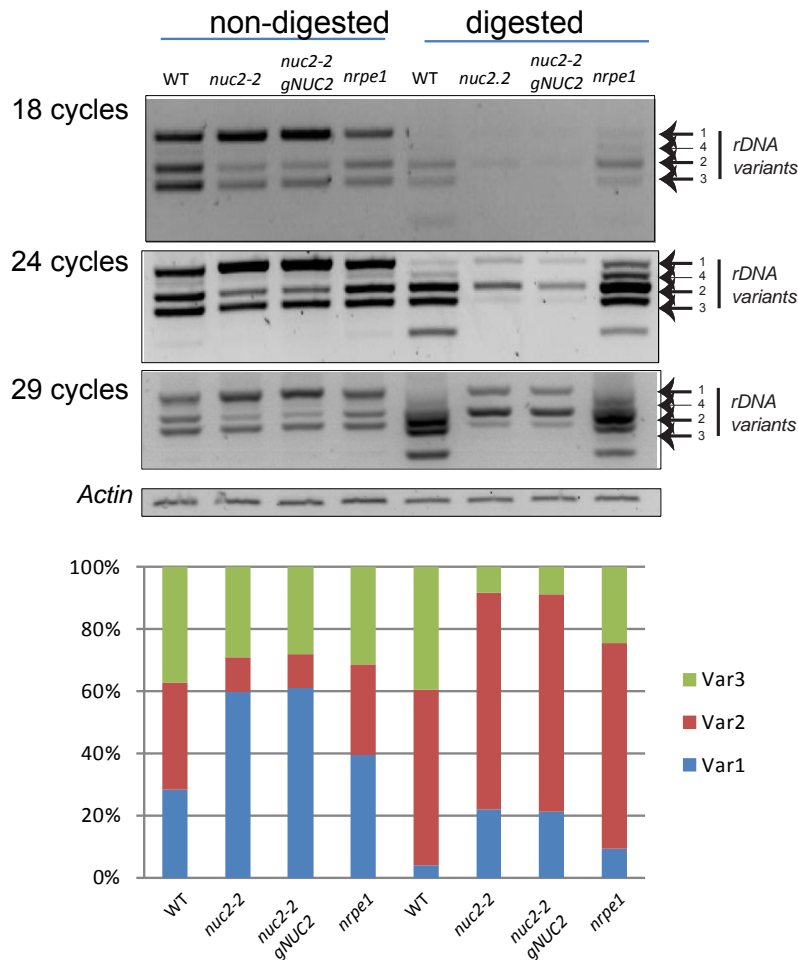

**Supplemental Figure 13:** Top, Genomic DNA from WT, *nuc2-2*, *nuc2-2 gNUC2* and *nrpe1* plants digested or not with MCrBC. Amplifications of 3'ETS were performed with 18, 24 and 29 cycles. Actin amplification was performed to verify similar amount of DNA. Bottom, Bar graph shows LabChip experiments (using PCR with 29 cycles) to determine relative abundance (%) of rDNA variants in MCrBC treated or untreated genomic DNA from WT, *nuc2-2*, *nuc2-2 gNUC2* and *nrpe1* plants.



Supplemental Data. Durut et al. (2014). Plant Cell 10.1105/tpc.114.123893

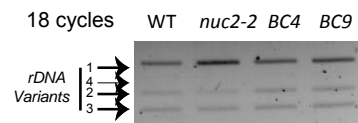

|               | 24 Cycles |       |       | 24 Cycles diluted |       |       |
|---------------|-----------|-------|-------|-------------------|-------|-------|
|               | VAR1      | VAR2  | VAR3  | VAR1              | VAR2  | VAR3  |
| WT            | 46,55     | 20,25 | 33,19 | 45,55             | 21,25 | 33,2  |
| <i>nuc2-2</i> | 62,83     | 11,94 | 25,23 | 62,1              | 12,39 | 25,51 |
| BC4           | 44,86     | 23,52 | 31,61 | 44,9              | 23,78 | 31,33 |
| BC9           | 47,06     | 22,16 | 30,78 | 46,99             | 22,82 | 30,19 |

**Supplemental Figure 14.** PCR and LabChip experiments to determine relative abundance of rDNA variants in WT, *nuc2-2* and WT x *nuc2-2* backcrossed plants. Top, PCR reactions with 18 cycles amplification. Bottom, LabChip experiment using 24 cycles PCR reaction samples (undiluted or 1:4 fold diluted) to determine relative abundance (%) of rDNA variants

**Supplemental Table 1**

| N° signals/Nucleolus | WT<br><i>n</i> =63 | <i>nuc2-2</i><br><i>n</i> = 68 | <i>nuc2-2 gNUC2</i><br><i>n</i> =44 |
|----------------------|--------------------|--------------------------------|-------------------------------------|
| ≤2                   | 100,00             | 86,76                          | 86,36                               |
| 3≥                   | 0,00               | 13,24                          | 13,64                               |
| Total                | 100,00             | 100,00                         | 100,00                              |

**Supplemental Table 1:** Percentage of nucleolus associated with ≤2 or ≥3 rDNA signals in WT, *nuc2-2* and *nuc2-2 gNUC2* plants. The *n* indicates number of nuclei analyzed in each sample.

**Supplemental Table 2**

| Oligo             | Sequence                   |
|-------------------|----------------------------|
| 5' <i>nuc2</i>    | GACGAGGAACTGTCCCTATG       |
| 3' <i>nuc2</i>    | CTACTCTTCATCATTAAAGACCG    |
| 5' <i>nuc2a</i>   | GAACACATTGGCGAGAAATG       |
| 3' <i>nuc2a</i>   | GAACCGTCCACGTTTCAAGCG      |
| 5' <i>nuc2b</i>   | GTCAAGTGTCTAGAGAATCAC      |
| 3' <i>nuc2b</i>   | CAGCTAGGTTTACGAGAAGC       |
| 5' <i>nuc2c</i>   | CAGAAGCCAATCTCTCTCTAC      |
| 3' <i>nuc2c</i>   | GAAGCAGGTGTTTCAACCTG       |
| 5' <i>nuc2q</i>   | TTACTAGGCCGCGATG           |
| 3' <i>nuc2q</i>   | GTCTCACGATCTGTTGG          |
| 5' <i>nuc1</i>    | CCAAGAAGCCCGCAGCTGCTG      |
| 3' <i>nuc1</i>    | CTACTCGTCACCGAAGGTAGTC     |
| 5' <i>elf1α</i>   | CTAAGGATGGTCAGACCCG        |
| 3' <i>elf1α</i>   | CTTCAGGTATGAAGACACC        |
| 5' <i>3ets</i>    | GACAGACTTGTCCAAAACGCCACC   |
| 3' <i>3ets</i>    | CTGGTCGAGGAATCCTGGACGATT   |
| 5' <i>flcq</i>    | CCGAACTCATGTTGAAGCTTGTTGAG |
| 3' <i>flcq</i>    | CGGAGATTTGTCCAGCAGGTG      |
| 5' <i>actineq</i> | GGTAACATTGTGCTCAGTGGTGG    |
| 3' <i>actineq</i> | AACGACCTTAATCTTCATGCTGC    |
| 5' <i>u3</i>      | CGACCTTACTTGAACAAGATCTGTTG |
| 3' <i>u3</i>      | CTGTCAGACCGCCGTGCGA        |

|                     |                             |
|---------------------|-----------------------------|
| <i>tis</i>          | CCTCGTGCCGATATCCGATACCATCCC |
| <i>p</i>            | CCGATCACCACACTCATAACGCCGAAC |
| <i>5'-315</i>       | GGATATGATGYAATGTTTTGTGATYG  |
| <i>3'+243</i>       | CCCATTCTCCTCRACRATTCARC     |
| <i>5' -250</i>      | CAAGCAAGCCCATTCTCCTC        |
| <i>3'+250</i>       | CAACTAGACCATGAAAATC         |
| <i>5'18S</i>        | CGTAGTTGAACCTTGGGATG        |
| <i>3'18S</i>        | CACGACCCGGCCAATTA           |
| <i>5'25S</i>        | GCATCAGGTCTCCAAGGTG         |
| <i>3'25S</i>        | AGCCCTCAGAGCCAATC           |
| <i>5'its1</i>       | GTATCGGCATGCTCGGG           |
| <i>3'its1</i>       | TTCGTTTGCATGTTCTTGAC        |
| <i>5's</i>          | CTTTTCGGGCNTTTTNGTG         |
| <i>3's</i>          | CGAAAAGGTATCACATGCC         |
| <i>5'AtLINE</i>     | CCGATGGTGACCAAGAGTTT        |
| <i>3'AtLINE</i>     | TCAATGTCTGGAGACCTCCTC       |
| <i>5'AtSN1</i>      | TGTCTTGGAAAGGATATTGGAAG     |
| <i>3'AtSN1</i>      | AAGTGGTGGTTGTACAAGCC        |
| <i>5NUC2intron</i>  | GATGATTGGATTYATTTTTGG       |
| <i>3NUC2intron</i>  | CAAAAACATACATAATCCCATC      |
| <i>5promNUC2</i>    | YTTGGGAGTYAAGTGTYTAG        |
| <i>3promNUC2</i>    | CTTRCCCATARATCCTRATC        |
| <i>bis3'ets_fwd</i> | TGGATAGTGAGAATAATAAGTGAAGAG |
| <i>bis3'ets_rev</i> | TCATCCATCATTTAATACTAATTCT   |

## Supplemental methods

### Immunostaining

4 week-old leaves were fixed in cold 4% formaldehyde in Tris buffer (10 mM Tris-HCl pH 7.5, 10 mM NaEDTA, 100 mM NaCl) for 20 minutes and wash for 2 x 10 minutes with cold Tris buffer. Leaves were then chopped with a razor blade in LB01 buffer (15 mM Tris-HCl pH 7.5, 2 mM NaEDTA, 0.5 mM spermine, 80 mM KCl, 20 mM NaCl and 0.1% Triton X-100). The cell slurry was then filtered through a falcon cell strainer cap of 30µm. 5 µl of nuclei suspension were added to 10 µl of sorting buffer (100 mM Tris-HCl pH 7.5, 50 mM KCl, 2 mM MgCl<sub>2</sub>, 0.05% Tween-20 and 5% sucrose) and spread on a polylysine slide. After air drying, samples were post-fixed in 2% formaldehyde in Phosphate Buffer (PBS) for 5 minutes and then washed twice with water before being air-dried.

In a moist chamber, 1X PBS + 0.5% triton were added directly on the slides for 15 min at RT, before being washed 3 times in 1X PBS for 5 min at RT. 1:500 dilution of purified α-At-NUC2 antibody (Pontvianne et al 2007), were applied on the slide in 1x PBS containing 3% BSA and 0.05% tween 20. After overnight at 4 °C, 3 washes in 1X PBS were performed, and the secondary antibody was added (Anti-Rabbit coupled with Alexa 488 from Invitrogen). After 3 hours at RT, the samples were washed 3 times in 1X PBS. Slides were then mounted in Vectashield at 1 µg/ml of DAPI and seal them with nail polish. Observation and imaging was performed using a confocal microscope LSM 700 from Zeiss.

### Bisulfite analysis of *Arabidopsis* NUC2 sequences

For bisulfite analysis, 500 ng of DNA was treated using the Epiect Bisulfite Kit (Qiagen). For *NUC2* sequences, primers *5'promnuc2/3'promnuc2* and *5'nuc2intron/3'nuc2intron* were used to amplify the *NUC2* promoter and transcribed (14<sup>th</sup> intron) sequences. For 3'ETS rDNA sequences, primers *bis3ets\_fwd/bis3'ets\_rev* were used.

### EMSA assay:

Recombinant NUC1-His and NUC2-His proteins were purified from *E. coli* cells. *NUC2* promoter sequences used for ChIP experiments (-466/-210, -307/-38 and -

137/+141) were amplified by PCR, purified and end labeled using T4- polynucleotide kinase in presence of  $\gamma\text{P}^{32}\text{-ATP}$ . For EMSA assay, equal amounts of NUC1-His and NUC2-His proteins were incubated for 30 minutes on ice with radioactive DNA probe in a buffer containing 10 mM Tris HCl pH7.5, 5% glycerol, 1mM DTT, 100 mM NaCl and 2.5 mM  $\text{MgCl}_2$ . Then nucleolin:DNA complex reactions were resolved on a 4% native polyacrylamide gel or 1% agarose gel and run in 0.5X TBE buffer. Complexes were analyzed using Phosphor Imager Technology.

### RNA-seq and bioinformatics analyses

Total RNA was extracted from three week-old *Arabidopsis* plant leaf tissues using TRIzol reagent (MRC, Inc.). Total RNA from three different pools of wild-type Col-0 or *nuc2-2* mutant plants was prepared independently to generate three biological replicates per sample. Sequencing was performed by the MGX facility using a Hiseq 2000 to generate 1X 51bp long reads. Illumina reads from non-stranded, polyA+ RNA-seq libraries were aligned to the *A. thaliana* TAIR10 annotated genome reference using Tophat2, Cufflinks, Cuffmerge and Cuffdiff (Langmead et al., 2009).

| Name          | Replicate number | Mapped   | Platform   | Facility | Source     |
|---------------|------------------|----------|------------|----------|------------|
| Col-0         | 1                | 43534749 | Hiseq 2000 | MGX      | This study |
| Col-0         | 2                | 38143538 | Hiseq 2000 | MGX      | This study |
| Col-0         | 3                | 45482777 | Hiseq 2000 | MGX      | This study |
| <i>nuc2-2</i> | 1                | 39905299 | Hiseq 2000 | MGX      | This study |
| <i>nuc2-2</i> | 2                | 44147023 | Hiseq 2000 | MGX      | This study |
| <i>nuc2-2</i> | 3                | 40600021 | Hiseq 2000 | MGX      | This study |
